# Supplementary material
Source: publisher site journal article supplement (https://www.kjim.org/upload/media/kjim-2021-475-suppl6.pdf)
Supplement: Supplementary file 1 [file kjim-2021-475-suppl6.pdf]

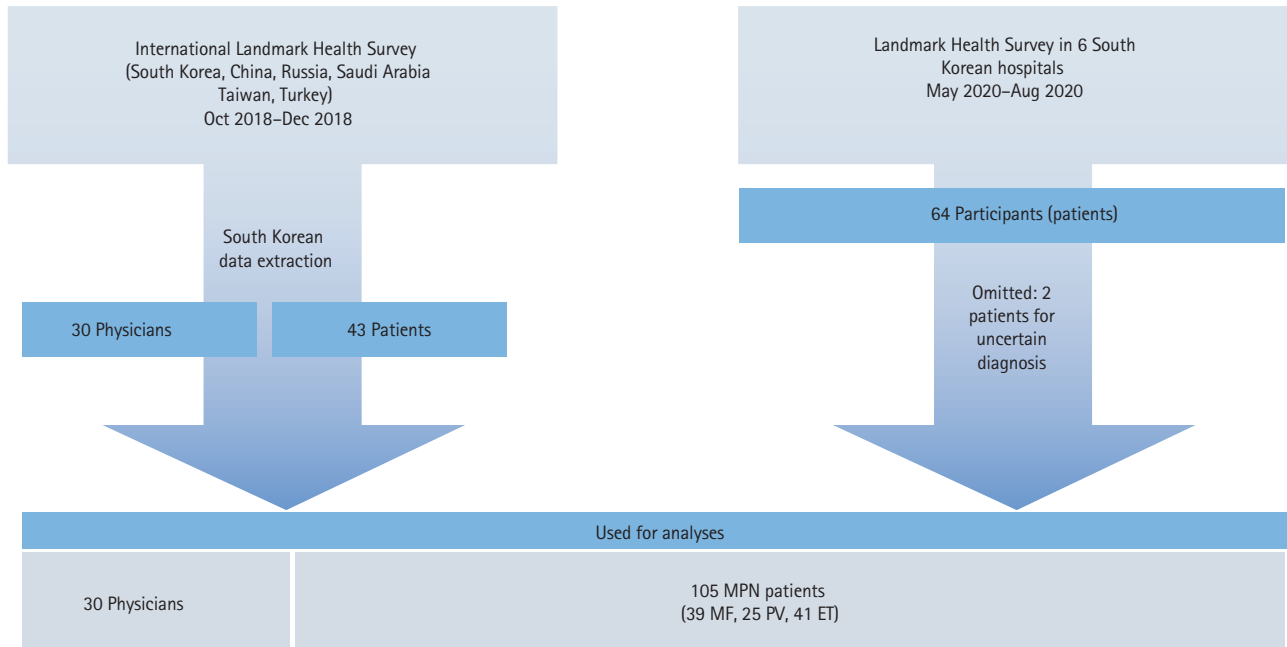

**Supplementary Figure 1.** Flow chart of Landmark Health Survey. MPN, myeloproliferative neoplasm; MF, myelofibrosis; PV, polycythemia vera; ET, essential thrombocythemia.
